# Supplementary material for: Circulating Tumor Cell Persistence Associates with Long-Term Clinical Outcome to a Therapeutic Cancer Vaccine in Prostate Cancer
Source: MDPI journal article supplement (doi:10.3390/jpm11070605), 2021-06-26
Supplement: s1 [file s1]

Table S1. Targeted serum profiling for differences between CTC status

| Protein (log2 <sup>NPX</sup> , median<br>[IQR]) | CTC status           |                      | p =   |
|-------------------------------------------------|----------------------|----------------------|-------|
|                                                 | Negative<br>n=13     | Positive<br>n=9      |       |
| CXCL5                                           | 11.41 [10.74, 11.88] | 12.32 [12.07, 12.56] | 0.007 |
| IL18                                            | 9.17 [8.64, 9.48]    | 8.46 [8.41, 8.64]    | 0.009 |
| ADGRG1                                          | 3.12 [2.03, 4.02]    | 1.72 [1.50, 2.04]    | 0.010 |
| HO1                                             | 12.36 [12.09, 12.46] | 11.87 [10.74, 12.19] | 0.044 |
| CD70                                            | 4.41 [4.06, 4.54]    | 4.70 [4.45, 4.80]    | 0.044 |
| CRTAM                                           | 5.11 [5.06, 5.38]    | 5.02 [4.76, 5.10]    | 0.063 |
| CXCL13                                          | 8.92 [8.88, 9.25]    | 8.74 [8.60, 8.86]    | 0.087 |
| CD8A                                            | 9.46 [9.01, 10.07]   | 8.81 [8.63, 9.74]    | 0.102 |
| GZMA                                            | 5.47 [5.20, 5.51]    | 5.20 [4.91, 5.26]    | 0.102 |
| IL10                                            | 2.53 [2.35, 2.70]    | 2.39 [2.01, 2.50]    | 0.137 |
| CXCL1                                           | 9.16 [8.90, 9.55]    | 9.72 [9.15, 9.86]    | 0.138 |
| TNFRSF12A                                       | 6.42 [6.20, 6.61]    | 6.11 [6.00, 6.42]    | 0.138 |
| CD40L                                           | 8.06 [7.52, 8.14]    | 7.03 [6.07, 7.83]    | 0.160 |
| KLRD1                                           | 5.82 [5.58, 6.08]    | 5.62 [5.29, 5.86]    | 0.160 |
| GAL9                                            | 7.75 [7.42, 7.91]    | 7.41 [7.35, 7.61]    | 0.184 |
| CCL17                                           | 8.62 [8.18, 9.10]    | 9.01 [8.93, 9.22]    | 0.184 |
| ICOSLG                                          | 5.73 [5.64, 6.61]    | 6.86 [5.79, 7.91]    | 0.184 |
| TNFRSF9                                         | 5.80 [5.70, 5.95]    | 5.68 [5.43, 5.80]    | 0.210 |
| FGF2                                            | 1.09 [0.75, 1.50]    | 0.82 [0.69, 0.86]    | 0.239 |
| GZMH                                            | 4.98 [4.62, 5.24]    | 4.60 [4.41, 5.01]    | 0.239 |
| VEGFC                                           | 2.91 [2.59, 3.29]    | 3.18 [3.07, 3.65]    | 0.239 |
| CD27                                            | 8.19 [7.61, 8.26]    | 7.96 [7.91, 8.00]    | 0.239 |
| NCR1                                            | 4.45 [4.16, 4.65]    | 4.22 [4.10, 4.32]    | 0.239 |
| ADA                                             | 2.55 [2.19, 2.83]    | 2.34 [2.14, 2.49]    | 0.271 |
| ANG2                                            | 4.82 [4.69, 4.99]    | 4.57 [4.49, 4.95]    | 0.271 |
| CCL20                                           | 5.94 [5.46, 6.23]    | 5.61 [5.20, 5.74]    | 0.271 |
| CX3CL1                                          | 6.77 [6.33, 7.03]    | 7.01 [6.63, 7.32]    | 0.305 |
| CCL13                                           | 8.74 [8.18, 9.46]    | 9.21 [8.81, 9.45]    | 0.342 |
| TWEAK                                           | 8.91 [8.71, 9.01]    | 8.79 [8.67, 8.97]    | 0.342 |
| MMP12                                           | 6.92 [6.67, 7.25]    | 7.30 [6.88, 7.51]    | 0.342 |
| VEGFA                                           | 8.97 [8.65, 9.18]    | 8.67 [8.55, 8.87]    | 0.342 |
| CSF1                                            | 7.66 [7.52, 7.73]    | 7.53 [7.42, 7.71]    | 0.342 |
| IL12RB1                                         | 1.91 [1.78, 2.09]    | 1.70 [1.63, 2.01]    | 0.382 |
| CA9                                             | 3.84 [3.48, 4.11]    | 4.04 [3.85, 4.24]    | 0.425 |
| EGF                                             | 10.13 [9.70, 10.85]  | 9.80 [8.73, 10.33]   | 0.470 |
| IL6                                             | 3.98 [3.65, 4.54]    | 4.19 [3.92, 4.69]    | 0.470 |
| PDCD1                                           | 3.36 [3.04, 3.83]    | 3.35 [3.03, 3.43]    | 0.470 |
| CCL8                                            | 8.12 [7.58, 8.28]    | 7.92 [7.28, 8.15]    | 0.470 |
| CCL4                                            | 8.02 [7.70, 8.42]    | 7.73 [7.55, 8.05]    | 0.470 |
| MMP7                                            | 11.51 [11.17, 11.72] | 11.25 [11.22, 11.43] | 0.470 |
| DCN                                             | 4.95 [4.84, 4.99]    | 4.93 [4.83, 5.45]    | 0.470 |
| RSF4                                            | 3.49 [2.98, 3.56]    | 3.19 [3.08, 3.30]    | 0.470 |
| PTN                                             | 2.07 [0.80, 2.85]    | 1.86 [1.25, 3.56]    | 0.514 |
| CD244                                           | 6.30 [5.86, 6.48]    | 6.10 [5.92, 6.14]    | 0.518 |
| GAL1                                            | 6.26 [6.12, 6.49]    | 6.20 [6.11, 6.34]    | 0.518 |
| MICAB                                           | 4.04 [3.83, 4.28]    | 4.19 [3.86, 4.43]    | 0.518 |
| NOS3                                            | 1.43 [1.09, 1.49]    | 1.25 [1.06, 1.47]    | 0.533 |
| PIGF                                            | 8.49 [8.43, 8.70]    | 8.48 [8.34, 8.57]    | 0.569 |
| TNFRSF21                                        | 7.88 [7.63, 7.99]    | 7.84 [7.58, 7.87]    | 0.569 |
| CCL19                                           | 9.28 [8.62, 9.80]    | 8.70 [8.52, 9.58]    | 0.621 |
| CCL3                                            | 5.81 [5.75, 6.13]    | 5.84 [5.52, 5.99]    | 0.621 |
| CCL2                                            | 10.84 [10.57, 11.06] | 10.88 [10.84, 11.08] | 0.676 |
| TGFB1                                           | 2.57 [2.27, 2.90]    | 2.37 [2.30, 2.64]    | 0.676 |
| CD28                                            | 1.57 [1.43, 1.72]    | 1.54 [1.40, 1.61]    | 0.676 |
| CD5                                             | 4.72 [4.53, 4.82]    | 4.79 [4.55, 5.01]    | 0.676 |
| GZMB                                            | 3.71 [3.42, 4.07]    | 3.71 [3.19, 3.80]    | 0.676 |
| IL8                                             | 6.61 [6.31, 6.81]    | 6.80 [6.39, 6.96]    | 0.732 |
| CCL7                                            | 2.90 [2.48, 3.32]    | 2.71 [2.54, 3.00]    | 0.732 |
| CXCL11                                          | 7.11 [6.29, 7.44]    | 6.46 [6.28, 7.01]    | 0.732 |
| VEGFR2                                          | 7.40 [7.21, 7.60]    | 7.37 [7.28, 7.54]    | 0.732 |
| FasL                                            | 6.02 [5.65, 6.29]    | 5.84 [5.73, 6.22]    | 0.732 |
| CXCL10                                          | 8.49 [7.38, 9.18]    | 8.03 [7.82, 8.87]    | 0.732 |
| IL12                                            | 6.49 [6.06, 6.75]    | 6.42 [6.33, 6.47]    | 0.732 |
| CXCL9                                           | 7.72 [7.18, 8.48]    | 7.24 [7.02, 8.54]    | 0.790 |
| TNFSF14                                         | 4.94 [4.63, 5.46]    | 4.89 [4.72, 5.50]    | 0.790 |
| HGF                                             | 8.13 [8.06, 8.35]    | 8.21 [7.96, 8.43]    | 0.790 |
| ANG1                                            | 10.28 [10.12, 10.37] | 10.28 [10.20, 10.37] | 0.849 |
| IL7                                             | 6.00 [5.45, 6.42]    | 6.01 [5.42, 6.40]    | 0.849 |
| TRAIL                                           | 8.21 [7.96, 8.26]    | 8.15 [7.96, 8.34]    | 0.849 |
| CD40                                            | 10.80 [10.74, 11.08] | 10.80 [10.53, 11.14] | 0.849 |
| PDGF_subunit_B                                  | 10.75 [10.68, 10.92] | 10.82 [10.81, 10.83] | 0.849 |
| LAMP3                                           | 4.81 [4.50, 5.53]    | 5.09 [4.56, 5.32]    | 0.849 |
| CASP8                                           | 6.91 [6.18, 7.63]    | 6.83 [6.30, 7.18]    | 0.849 |
| CD83                                            | 2.57 [2.22, 2.65]    | 2.53 [2.28, 2.83]    | 0.849 |
| TIE2                                            | 7.81 [7.69, 8.03]    | 7.86 [7.64, 8.03]    | 0.909 |
| CD4                                             | 0.60 [0.45, 0.80]    | 0.59 [0.47, 0.80]    | 0.909 |
| PDL1                                            | 4.79 [4.59, 5.07]    | 4.81 [4.58, 5.17]    | 0.909 |
| CCL23                                           | 9.99 [9.85, 10.10]   | 10.03 [9.75, 10.16]  | 0.909 |
| SDF1                                            | 1.24 [1.10, 1.30]    | 1.26 [1.03, 1.29]    | 0.909 |
| PDL2                                            | 2.59 [2.48, 2.74]    | 2.57 [2.28, 4.50]    | 0.970 |
| ARG1                                            | 3.56 [2.84, 4.51]    | 3.69 [2.79, 4.37]    | 1.000 |
| IL4                                             | 1.41 [1.35, 1.46]    | 1.16 [0.98, 1.35]    | 1.000 |

IQR= Inter quartile range

**Table S2. Targeted serum profiling for differences in immune response**

| Protein (log <sup>2</sup> <sup>NPX</sup> ,<br>median [IQR]) | No. of peptides in IR |                      | p=    |
|-------------------------------------------------------------|-----------------------|----------------------|-------|
|                                                             | 0/1<br>n=10           | 2+<br>n=12           |       |
| CXCL5                                                       | 11.03 [10.52, 11.84]  | 12.26 [11.96, 12.54] | 0.005 |
| CCL17                                                       | 8.36 [7.42, 8.66]     | 9.05 [8.93, 9.31]    | 0.009 |
| CXCL1                                                       | 8.90 [8.67, 9.29]     | 9.61 [9.15, 9.85]    | 0.017 |
| CCL13                                                       | 8.38 [7.94, 9.00]     | 9.26 [8.80, 9.64]    | 0.045 |
| TIE2                                                        | 7.98 [7.79, 8.17]     | 7.73 [7.57, 7.98]    | 0.054 |
| IL18                                                        | 9.02 [8.68, 9.35]     | 8.51 [8.44, 8.65]    | 0.105 |
| IL8                                                         | 6.50 [5.93, 6.70]     | 6.84 [6.39, 6.96]    | 0.165 |
| PDGF-B                                                      | 10.69 [10.66, 10.80]  | 10.83 [10.81, 10.91] | 0.165 |
| IL6                                                         | 3.77 [3.52, 4.51]     | 4.26 [3.96, 4.76]    | 0.190 |
| CCL2                                                        | 10.71 [10.50, 10.97]  | 10.91 [10.84, 11.16] | 0.190 |
| CRTAM                                                       | 5.21 [5.07, 5.37]     | 5.04 [4.89, 5.14]    | 0.190 |
| VEGF-C                                                      | 2.99 [2.40, 3.20]     | 3.15 [2.95, 3.65]    | 0.190 |
| CCL8                                                        | 7.58 [7.37, 8.14]     | 8.08 [7.83, 8.46]    | 0.190 |
| CCL3                                                        | 5.95 [5.77, 6.47]     | 5.79 [5.49, 5.98]    | 0.217 |
| PDL2                                                        | 2.74 [2.54, 2.88]     | 2.52 [2.27, 2.61]    | 0.217 |
| EGF                                                         | 10.47 [9.84, 10.95]   | 9.78 [9.40, 10.33]   | 0.280 |
| IL7                                                         | 5.82 [5.00, 6.15]     | 6.16 [5.45, 6.41]    | 0.355 |
| TNFRSF9                                                     | 5.84 [5.73, 5.93]     | 5.72 [5.51, 5.82]    | 0.396 |
| PIGF                                                        | 8.47 [8.36, 8.50]     | 8.57 [8.42, 8.75]    | 0.396 |
| CXCL11                                                      | 6.45 [6.22, 7.19]     | 6.97 [6.37, 7.62]    | 0.396 |
| GZMH                                                        | 4.99 [4.62, 5.02]     | 4.64 [4.28, 5.20]    | 0.396 |
| CCL4                                                        | 8.15 [7.55, 8.87]     | 7.92 [7.54, 8.07]    | 0.396 |
| CX3CL1                                                      | 6.69 [6.30, 7.11]     | 6.79 [6.63, 7.30]    | 0.396 |
| VEGFA                                                       | 8.65 [8.37, 9.14]     | 8.87 [8.66, 9.06]    | 0.396 |
| CD40L                                                       | 8.06 [7.08, 8.25]     | 7.76 [6.46, 8.07]    | 0.440 |
| CD244                                                       | 6.30 [5.88, 6.49]     | 6.07 [5.90, 6.26]    | 0.440 |
| HO1                                                         | 12.28 [12.01, 12.44]  | 12.12 [11.87, 12.40] | 0.440 |
| CXCL10                                                      | 7.97 [7.24, 8.80]     | 8.36 [7.86, 9.04]    | 0.440 |
| MMP12                                                       | 6.85 [6.58, 7.48]     | 7.25 [6.84, 7.48]    | 0.440 |
| IL10                                                        | 2.53 [2.33, 2.70]     | 2.43 [2.27, 2.54]    | 0.447 |
| TRAIL                                                       | 8.18 [7.67, 8.26]     | 8.19 [8.02, 8.33]    | 0.487 |
| ICOSLG                                                      | 6.61 [5.73, 6.76]     | 5.80 [5.63, 6.92]    | 0.487 |
| CSF1                                                        | 7.56 [7.42, 7.67]     | 7.66 [7.50, 7.76]    | 0.487 |
| GZMA                                                        | 5.26 [5.21, 5.50]     | 5.23 [5.11, 5.48]    | 0.537 |
| LAMP3                                                       | 4.93 [4.33, 5.26]     | 4.98 [4.56, 5.49]    | 0.537 |
| CCL20                                                       | 5.87 [5.38, 6.17]     | 5.64 [5.21, 5.94]    | 0.537 |
| FGF2                                                        | 0.94 [0.76, 1.28]     | 0.86 [0.66, 1.03]    | 0.556 |
| CD4                                                         | 0.60 [0.43, 0.69]     | 0.60 [0.46, 0.88]    | 0.589 |
| TWEAK                                                       | 8.74 [8.48, 9.00]     | 8.88 [8.71, 8.97]    | 0.589 |
| RSF4                                                        | 3.26 [2.86, 3.53]     | 3.29 [3.16, 3.49]    | 0.589 |
| CXCL13                                                      | 8.88 [8.61, 8.99]     | 8.89 [8.73, 9.15]    | 0.589 |
| IL12RB1                                                     | 1.92 [1.75, 2.06]     | 1.78 [1.68, 1.98]    | 0.589 |
| CD8A                                                        | 9.01 [8.64, 9.45]     | 9.54 [8.81, 9.78]    | 0.643 |
| CASP8                                                       | 6.95 [6.38, 7.46]     | 6.82 [6.07, 7.30]    | 0.643 |
| IL4                                                         | 1.30 [1.30, 1.30]     | 1.51 [1.15, 1.52]    | 0.655 |
| CXCL9                                                       | 7.64 [6.94, 8.40]     | 7.65 [7.07, 8.58]    | 0.700 |
| GAL1                                                        | 6.26 [6.06, 6.33]     | 6.27 [6.11, 6.43]    | 0.700 |
| MMP7                                                        | 11.32 [11.14, 11.69]  | 11.38 [11.22, 11.63] | 0.700 |
| ANG2                                                        | 4.77 [4.59, 4.91]     | 4.76 [4.57, 5.11]    | 0.700 |
| NOS3                                                        | 1.42 [1.05, 1.54]     | 1.43 [1.12, 1.45]    | 0.711 |
| CA9                                                         | 3.92 [3.66, 4.42]     | 3.94 [3.52, 4.20]    | 0.758 |
| ADA                                                         | 2.44 [2.02, 2.67]     | 2.46 [2.27, 2.68]    | 0.758 |
| PDCCD1                                                      | 3.18 [2.91, 3.80]     | 3.35 [3.10, 3.50]    | 0.758 |
| KLRD1                                                       | 5.67 [5.47, 5.95]     | 5.76 [5.59, 5.99]    | 0.758 |
| CCL7                                                        | 2.72 [2.40, 3.31]     | 2.75 [2.64, 3.09]    | 0.817 |
| GAL9                                                        | 7.72 [7.25, 7.93]     | 7.58 [7.37, 7.73]    | 0.817 |
| TGFB1                                                       | 2.47 [2.24, 2.68]     | 2.47 [2.29, 2.86]    | 0.817 |
| FasL                                                        | 5.77 [5.67, 6.41]     | 6.03 [5.64, 6.22]    | 0.817 |
| PDL1                                                        | 4.86 [4.59, 5.16]     | 4.78 [4.58, 5.03]    | 0.817 |
| CCL23                                                       | 10.02 [9.81, 10.08]   | 9.92 [9.77, 10.18]   | 0.817 |
| TNFRSF21                                                    | 7.84 [7.64, 7.98]     | 7.84 [7.60, 7.93]    | 0.817 |
| IL12                                                        | 6.45 [5.93, 6.96]     | 6.42 [6.23, 6.57]    | 0.817 |
| ARG1                                                        | 3.33 [2.90, 4.21]     | 3.94 [2.74, 4.45]    | 0.866 |
| PTN                                                         | 2.23 [1.32, 3.35]     | 1.80 [1.20, 2.81]    | 0.866 |
| CD40                                                        | 10.87 [10.65, 11.09]  | 10.80 [10.61, 11.13] | 0.877 |
| TNFSF14                                                     | 5.01 [4.70, 5.46]     | 4.90 [4.60, 5.49]    | 0.877 |
| CCL19                                                       | 9.27 [8.31, 9.83]     | 9.10 [8.53, 9.59]    | 0.877 |
| HGF                                                         | 8.23 [8.03, 8.30]     | 8.16 [8.04, 8.45]    | 0.877 |
| CD70                                                        | 4.48 [4.33, 4.63]     | 4.48 [4.21, 4.71]    | 0.877 |
| GZMB                                                        | 3.71 [3.50, 3.79]     | 3.72 [3.15, 4.22]    | 0.877 |
| CD83                                                        | 2.46 [2.22, 2.92]     | 2.55 [2.46, 2.62]    | 0.877 |
| ADGRG1                                                      | 2.03 [1.79, 2.61]     | 2.28 [1.72, 3.20]    | 0.934 |
| ANG1                                                        | 10.30 [10.08, 10.41]  | 10.27 [10.19, 10.35] | 0.939 |
| VEGRF2                                                      | 7.39 [7.24, 7.59]     | 7.40 [7.26, 7.55]    | 0.939 |
| CD27                                                        | 7.84 [7.52, 8.28]     | 7.99 [7.95, 8.20]    | 0.939 |
| TNFRSF12A                                                   | 6.32 [6.14, 6.44]     | 6.34 [6.02, 6.56]    | 0.939 |
| CD5                                                         | 4.70 [4.47, 5.03]     | 4.75 [4.55, 4.85]    | 0.939 |
| NCR1                                                        | 4.25 [4.04, 4.62]     | 4.29 [4.11, 4.48]    | 0.939 |

|       |                   |                   |       |
|-------|-------------------|-------------------|-------|
| DCN   | 4.95 [4.87, 4.98] | 4.93 [4.83, 5.28] | 0.939 |
| SDF1  | 1.20 [1.10, 1.34] | 1.25 [1.09, 1.29] | 0.939 |
| CD28  | 1.49 [1.37, 1.87] | 1.57 [1.46, 1.61] | 1.000 |
| MICAB | 4.10 [3.94, 4.25] | 4.14 [3.86, 4.37] | 1.000 |

---

IQR= Inter quartile range
